# Supplementary material
Source: HighWire-hosted journal article supplement (http://www.qdcxjkg.com/highwire/filestream/113669/field_highwire_adjunct_files/0/ERJ-01110-2012_Disclosures.pdf)
Supplement: ERJ-01110-2012_Disclosures.pdf [file ERJ-01110-2012_Disclosures.pdf]

**T.J.M. Verheij:** has received an unconditional grant for a study from Pfizer and has attended an expert meeting organized by Pfizer.
